# Supplementary material for: Cranial irradiation induces transient microglia accumulation, followed by long-lasting inflammation and loss of microglia
Source: PubMed Central journal article supplement (PMC5347693; doi:10.18632/oncotarget.12929), 2016-10-26
Supplement: oncotarget-07-82305-s001.pdf [file oncotarget-07-82305-s001.pdf]

## Cranial irradiation induces transient microglia accumulation, followed by long-lasting inflammation and loss of microglia

### Supplementary Material

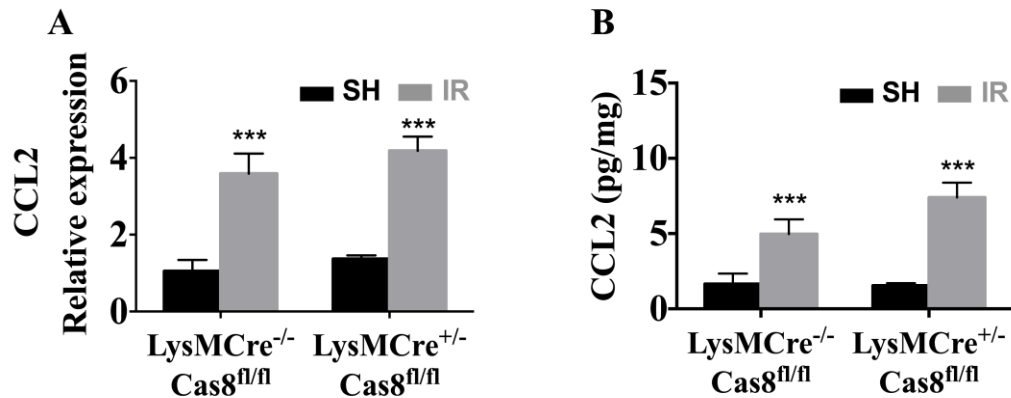

**Supplementary figure 1. Conditional caspase-8 deletion in myeloid cells did not alter irradiation-induced CCL2 expression.** Microglia from sham controls (SH) expressed low CCL2 mRNA levels. Irradiation (IR) increased microglial CCL2 mRNA expression, and this elevation was not impaired in caspase-8deficient mice (A). The CCL2 protein levels in hippocampal homogenates were also elevated after IR, but no difference was found between genotypes. Data are shown as mean  $\pm$  S.D., n=6 for the sham groups, 7 for the irradiated groups. \*\*\*P<0.001 for treatment.
